# Supplementary material for: Efficacy of Abiraterone and Enzalutamide in Pre- and Postdocetaxel Castration-Resistant Prostate Cancer: A Trial-Level Meta-Analysis
Source: Hindawi journal article supplement (doi:10.1155/2017/8560827), 2017-01-01
Supplement: f1 [file 8560827.f1.pdf]

# S1: Funnel Plots

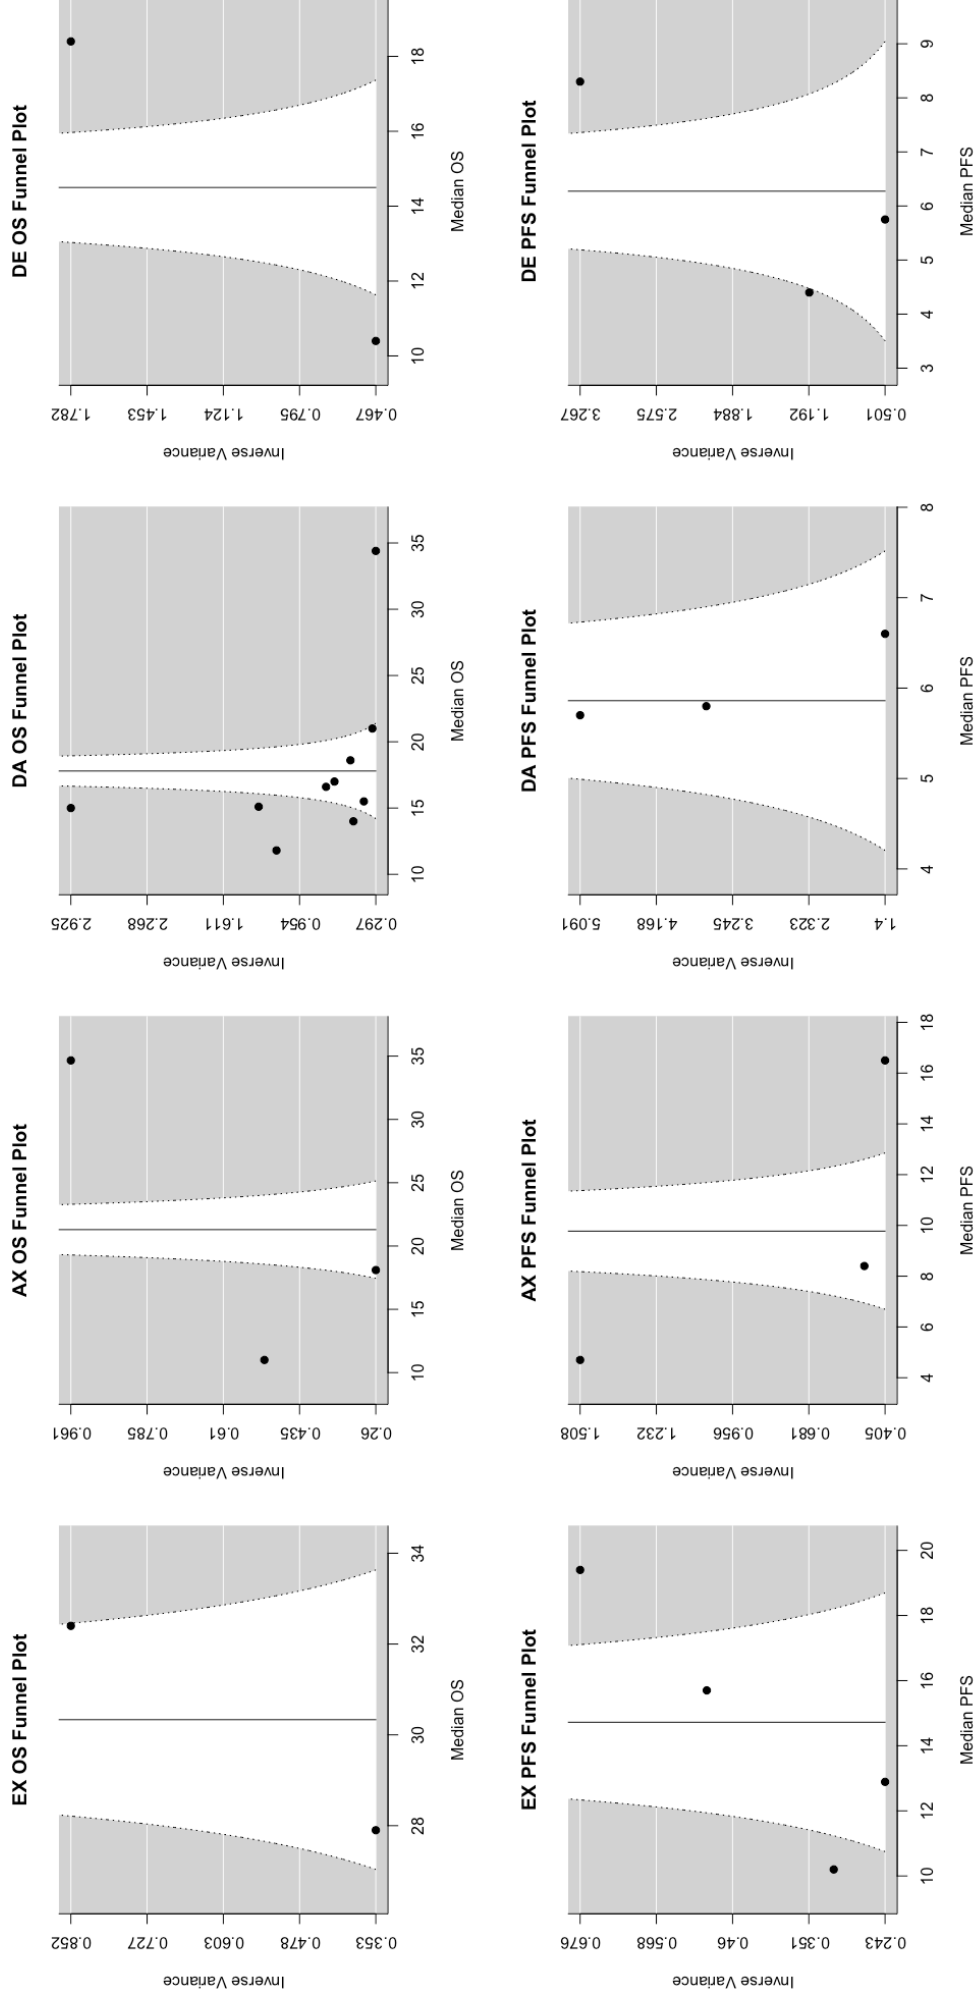

# S2: Studies Reporting OS Estimates

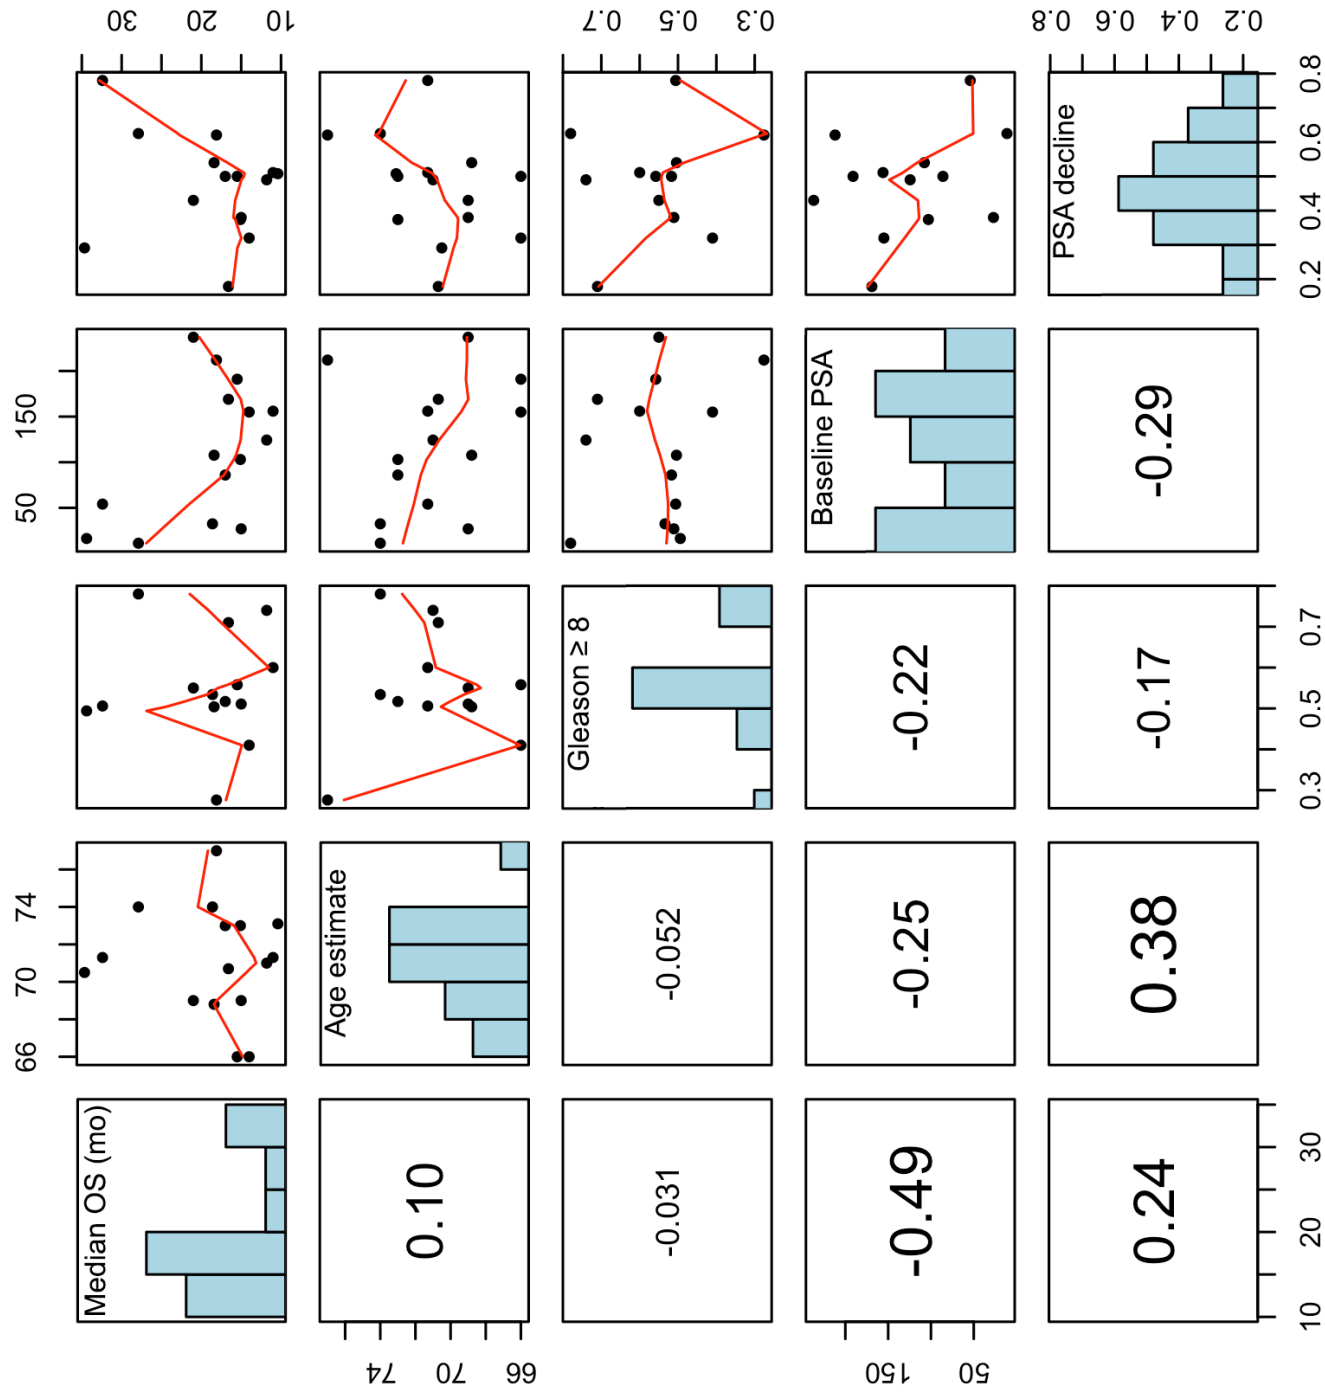

# S3: Studies Reporting PFS Estimates

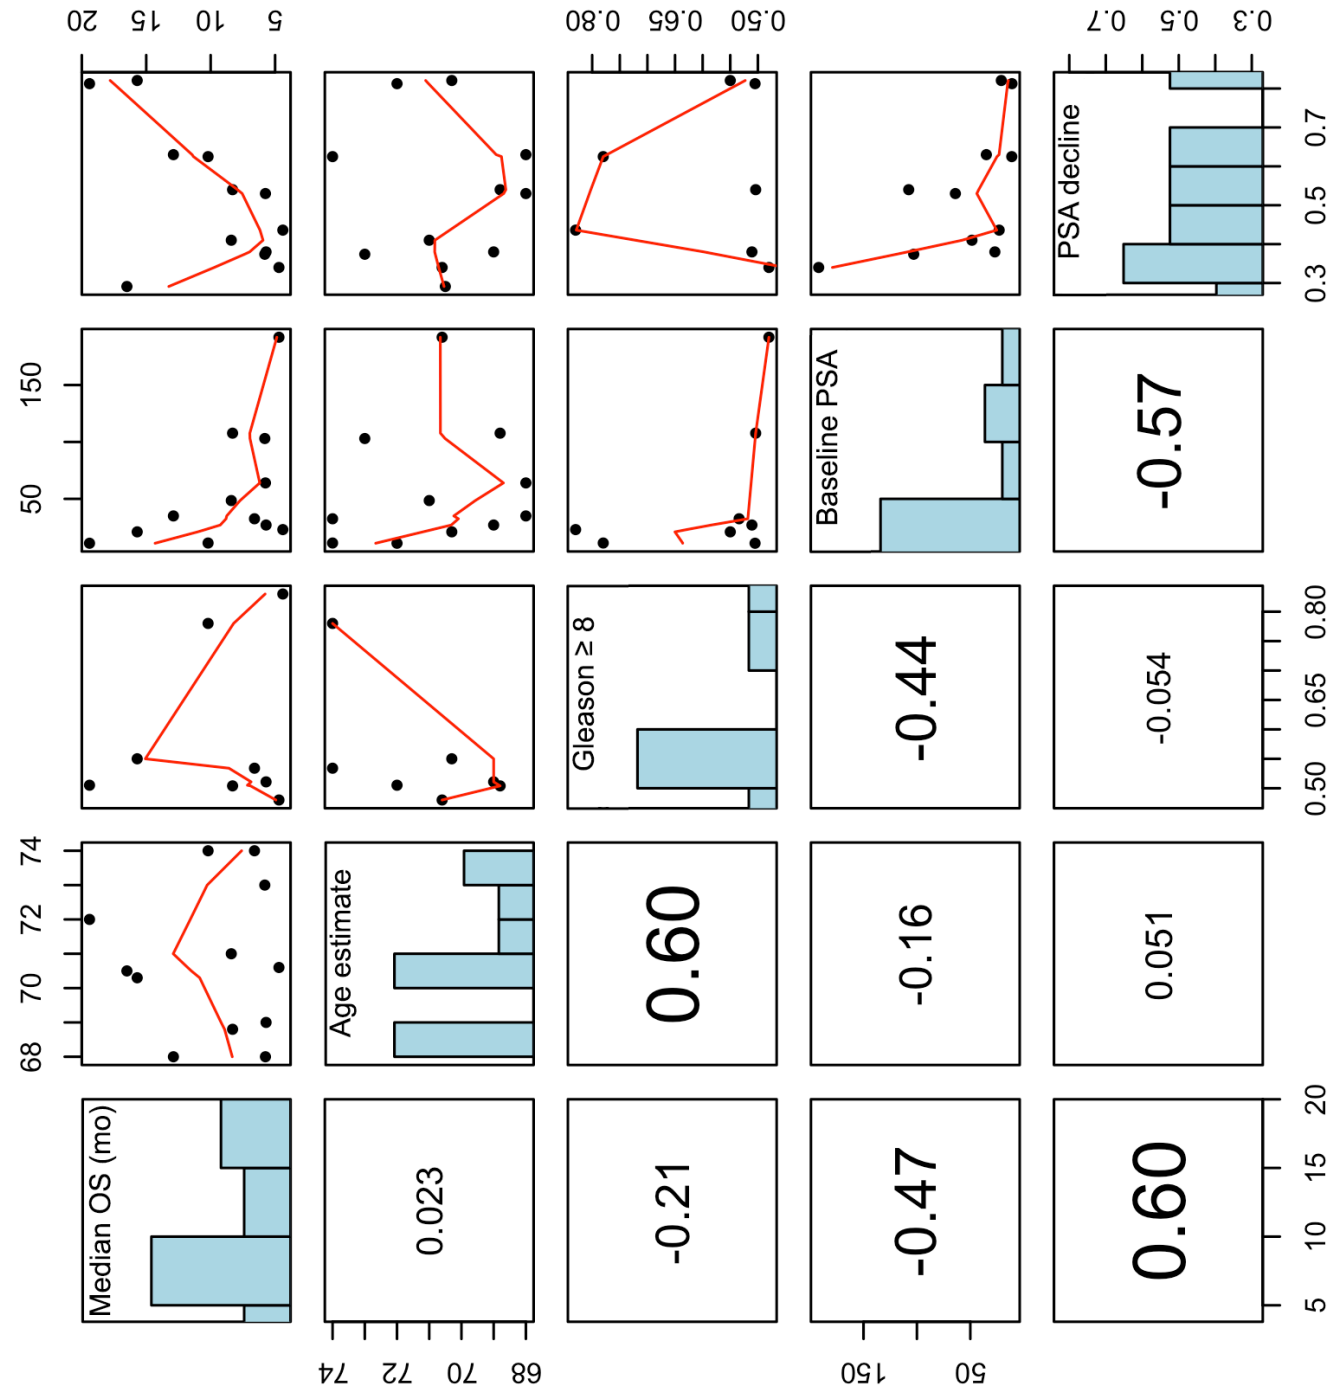

## S4: Regression Analysis for Median OS

##### mOS ~ gleason\_8

|           | estimate | se     | zval    | pval   | ci.lb    | ci.ub   |     |
|-----------|----------|--------|---------|--------|----------|---------|-----|
| intrcpt   | 22.9784  | 1.6158 | 14.2214 | <.0001 | 19.8116  | 26.1453 | *** |
| gleason_8 | -9.2563  | 2.8756 | -3.2189 | 0.0013 | -14.8924 | -3.6202 | **  |

##### mOS ~ PSA\_baseline

|              | estimate | se     | zval    | pval   | ci.lb   | ci.ub   |     |
|--------------|----------|--------|---------|--------|---------|---------|-----|
| intrcpt      | 20.1097  | 0.5241 | 38.3728 | <.0001 | 19.0826 | 21.1369 | *** |
| PSA_baseline | -0.0273  | 0.0048 | -5.7313 | <.0001 | -0.0366 | -0.0180 | *** |

##### mOS ~ DAvDE

|                     | estimate | se     | zval    | pval   | ci.lb   | ci.ub   |     |
|---------------------|----------|--------|---------|--------|---------|---------|-----|
| intrcpt             | 15.9322  | 0.3372 | 47.2455 | <.0001 | 15.2713 | 16.5931 | *** |
| factor(treatment)DE | 0.8074   | 0.7473 | 1.0804  | 0.2799 | -0.6573 | 2.2721  |     |

##### mOS ~ AXvEX

|                     | estimate | se     | zval    | pval   | ci.lb   | ci.ub   |     |
|---------------------|----------|--------|---------|--------|---------|---------|-----|
| intrcpt             | 25.1549  | 0.7589 | 33.1451 | <.0001 | 23.6674 | 26.6423 | *** |
| factor(treatment)EX | 5.9267   | 1.1856 | 4.9989  | <.0001 | 3.6030  | 8.2504  | *** |

##### mOS ~ DAvDE + gleason\_8

|                     | estimate | se     | zval    | pval   | ci.lb    | ci.ub   |     |
|---------------------|----------|--------|---------|--------|----------|---------|-----|
| intrcpt             | 23.3303  | 2.0999 | 11.1102 | <.0001 | 19.2146  | 27.4461 | *** |
| factor(treatment)DE | 1.5450   | 0.8625 | 1.7913  | 0.0732 | -0.1455  | 3.2355  | .   |
| gleason_8           | -12.8479 | 3.6631 | -3.5074 | 0.0005 | -20.0274 | -5.6685 | *** |

##### mOS ~ AXvEX + gleason\_8

|                     | estimate | se     | zval    | pval   | ci.lb    | ci.ub   |     |
|---------------------|----------|--------|---------|--------|----------|---------|-----|
| intrcpt             | 22.7763  | 2.8003 | 8.1335  | <.0001 | 17.2878  | 28.2648 | *** |
| factor(treatment)EX | 19.5164  | 1.5371 | 12.6965 | <.0001 | 16.5037  | 22.5292 | *** |
| gleason_8           | -19.1225 | 5.2077 | -3.6720 | 0.0002 | -29.3294 | -8.9156 | *** |

## S5: Regression Analysis for Median PFS

##### mPFS ~ gleason\_8

|           | estimate | se     | zval    | pval   | ci.lb    | ci.ub   |     |
|-----------|----------|--------|---------|--------|----------|---------|-----|
| intrcpt   | 10.0028  | 1.5122 | 6.6150  | <.0001 | 7.0391   | 12.9666 | *** |
| gleason_8 | -4.9759  | 2.7427 | -1.8142 | 0.0696 | -10.3514 | 0.3997  | .   |

##### PFS ~ PSA\_baseline

|              | estimate | se     | zval    | pval   | ci.lb   | ci.ub   |     |
|--------------|----------|--------|---------|--------|---------|---------|-----|
| intrcpt      | 8.1578   | 0.3874 | 21.0597 | <.0001 | 7.3986  | 8.9170  | *** |
| PSA_baseline | -0.0155  | 0.0045 | -3.4794 | 0.0005 | -0.0243 | -0.0068 | *** |

##### mPFS ~ DAvDE

|                     | estimate | se     | zval    | pval   | ci.lb  | ci.ub  |     |
|---------------------|----------|--------|---------|--------|--------|--------|-----|
| intrcpt             | 5.8608   | 0.3154 | 18.5838 | <.0001 | 5.2426 | 6.4789 | *** |
| factor(treatment)DE | 1.2467   | 0.5489 | 2.2713  | 0.0231 | 0.1709 | 2.3225 | *   |

##### mPFS ~ AXvEX

|                     | estimate | se     | zval    | pval   | ci.lb  | ci.ub   |     |
|---------------------|----------|--------|---------|--------|--------|---------|-----|
| intrcpt             | 7.4394   | 0.6465 | 11.5069 | <.0001 | 6.1722 | 8.7065  | *** |
| factor(treatment)EX | 8.3058   | 0.9978 | 8.3245  | <.0001 | 6.3503 | 10.2614 | *** |

##### mPFS ~ DAvDE + gleason\_8

|                     | estimate | se     | zval    | pval   | ci.lb    | ci.ub   |     |
|---------------------|----------|--------|---------|--------|----------|---------|-----|
| intrcpt             | 11.8987  | 1.7348 | 6.8587  | <.0001 | 8.4985   | 15.2989 | *** |
| factor(treatment)DE | 2.2405   | 0.6627 | 3.3810  | 0.0007 | 0.9417   | 3.5393  | *** |
| gleason_8           | -11.6412 | 3.2762 | -3.5533 | 0.0004 | -18.0624 | -5.2201 | *** |

##### mPFS ~ AXvEX + gleason\_8

|                     | estimate | se     | zval    | pval   | ci.lb    | ci.ub    |     |
|---------------------|----------|--------|---------|--------|----------|----------|-----|
| intrcpt             | 19.8814  | 3.7832 | 5.2552  | <.0001 | 12.4665  | 27.2964  | *** |
| factor(treatment)EX | 14.6263  | 1.3819 | 10.5843 | <.0001 | 11.9179  | 17.3348  | *** |
| gleason_8           | -31.6280 | 7.6969 | -4.1092 | <.0001 | -46.7136 | -16.5423 | *** |
